# Supplementary material
Source: PubMed Central journal article supplement (PMC11253812)
Supplement: ehp13588.smcontents.508.pdf [file ehp13588.smcontents.508.pdf]

**Note to readers with disabilities:** *EHP* strives to ensure that all journal content is accessible to all readers. However, some figures and Supplemental Material published in *EHP* articles may not conform to [508 standards](#) due to the complexity of the information being presented. If you need assistance accessing journal content, please contact [ehpsubmissions@niehs.nih.gov](mailto:ehpsubmissions@niehs.nih.gov). Our staff will work with you to assess and meet your accessibility needs within 3 working days.

### **Supplemental Material**

#### **Midlife Residential Greenness and Late-Life Cognitive Decline among Nurses' Health Study Participants**

Marcia Pescador Jimenez, Maude Wagner, Francine Laden, Jaime E. Hart, Francine Grodstein, and Peter James

#### **Table of Contents**

**Table S1.** Demographic characteristics and green space exposure of Nurses' Health Study participants with complete information on the outcome cognitive function and cognitive decline, and initial cohort invited to participate in the study of cognitive function.

**Table S2.** Association between midlife exposure to greenness (NDVI, 1986-1994) and baseline cognitive function (1995-2001) among women in the Nurses' Health Study, further adjusting for Physical Activity and Body Mass Index (n=16,962).

**Table S3.** Association between midlife exposure to greenness (NDVI, 1986-1994) and baseline cognitive function (1995-2001) among women in the Nurses' Health Study, at a 1230m buffer (n=16,962).

**Table S4.** Association between annual average greenness at midlife (NDVI, 1986-1994) and baseline cognitive function (1995-2001) among women in the Nurses' Health Study, at a 270m buffer (n=16,962).

**Table S5.** Association between annual average greenness in the immediate year prior to the first cognitive assessment (NDVI) and baseline cognitive function (1995-2001) among women in the Nurses' Health Study (n=16,861).

**Table S6.** Association between annual average greenness (NDVI, 1986-1994) and baseline cognitive function (1995-2001) excluding participants in the lowest 10% of the distribution of cognitive performance in the Nurses' Health Study, at a 270m buffer (n=15,478).

**Table S7.** Association between midlife exposure to greenness (NDVI, 1986-1994) and baseline cognitive function (1995-2001) removing participants who had just moved to the address for less than 2 years (N=13,945) and who changed their address during the follow-up period (N=13,588), Nurses' Health Study, at a 270m buffer.

**Table S8.** Longitudinal association between midlife exposure to greenness (NDVI, 1986-1994) and cognitive decline (1995-2008) among women in the Nurses' Health Study, at a 1230m buffer (n=16,962).

**Table S9.** Longitudinal association between annual average greenness at midlife (NDVI, 1986-1994) and cognitive decline (1995-2008) among women in the Nurses' Health Study, at a 270m buffer (n=16,962).

**Table S10.** Longitudinal association between annual greenness in the immediate year prior to the first cognitive assessment (NDVI) and cognitive decline (1995-2008) among women in the Nurses' Health Study (n=16,861).

**Table S11.** Longitudinal association between annual average greenness (NDVI, 1986-1994) and cognitive decline (1995-2008) excluding participants in the lowest 10% of the distribution of cognitive performance in the Nurses' Health Study, at a 270m buffer (n=15,478).

**Table S12.** Longitudinal association between midlife exposure to greenness (NDVI, 1986-1994) and cognitive decline (1995-2008) excluding participants who had just moved to the address for less than 2 years (N=13,945) or who changed their address during the follow-up period (N=13,588), Nurses' Health Study, at a 270m buffer.

**Table S13.** Association of midlife exposure to greenness (NDVI, 1986-1994) with baseline cognitive function and cognitive decline of global cognition (1995-2008), stratified by: neighborhood socioeconomic status, population density, and apolipoprotein E  $\epsilon$ 4 (apoE  $\epsilon$ 4) carriers, the Nurses' Health Study (n=16,962).

**Table S14.** Association of midlife exposure to greenness (NDVI, 1986-1994) with baseline cognitive function and cognitive decline of global cognition (1995-2008), stratified by: apolipoprotein E  $\epsilon$ 4 (apoE  $\epsilon$ 4) carriers, restricted to women without any APOE- $\epsilon$ 2 allele, the Nurses' Health Study (n=15,709).

**Figure S1.** Study timeline.

**Figure S2.** Directed Acyclic Graph of the hypothesized association.

**Figure S3.** Non-linear associations between midlife exposure to greenness (NDVI, 1986-1994) and baseline cognitive function (1995-2001) among women in the Nurses' Health Study, at a 270m buffer.

**Figure S4.** Estimated trajectories of global cognition over time for the lowest and highest midlife exposure to greenness (NDVI, 1986-1994) among women in the Nurses' Health Study (n=16,962).

**Additional File-** Excel Document
